# Supplementary material for: COVID-19 Biomarkers Comparison: Children, Adults and Elders
Source: MDPI journal article supplement (doi:10.3390/medicina59050877), 2023-05-03
Supplement: s1 [file s1]

### Supplementary material no. 1

Visually, the ROC curves for each biomarker, in regards to ICU admission, can be observed in figures 1-6. Figure 7-12 show the ROC curves for each biomarker, in regards to the deceased.

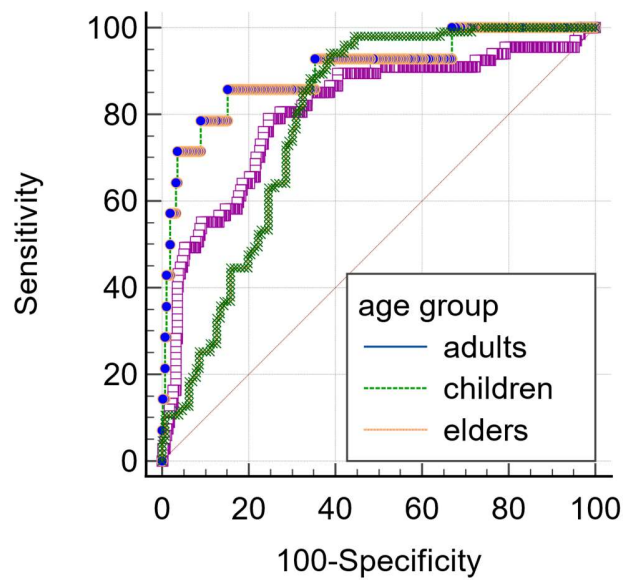

**Figure 1.** ROC curve analysis and comparison of CRP in regards to ICU admission

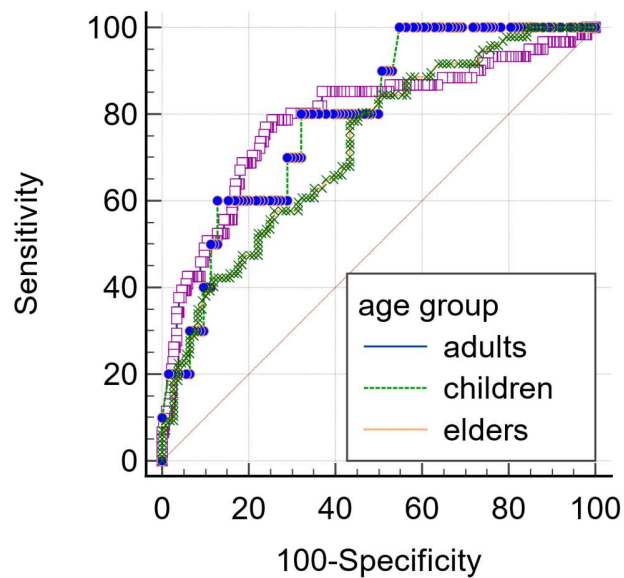

**Figure 2.** ROC curve analysis and comparison of LDH in regards to ICU admission

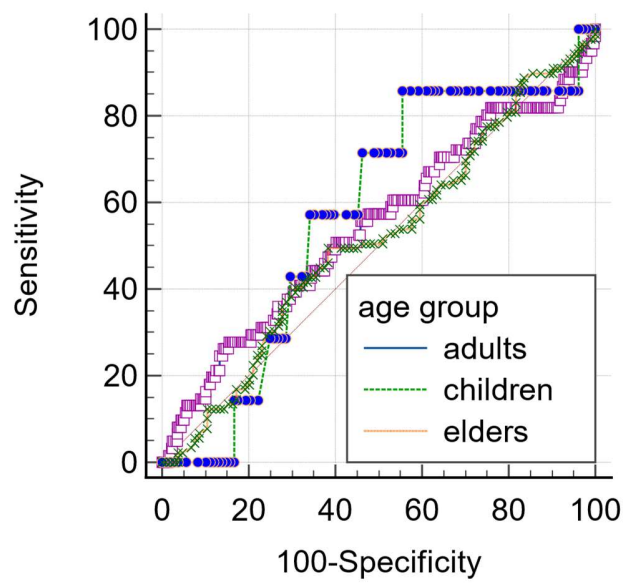

**Figure 3.** ROC curve analysis and comparison of CK in regards to ICU admission

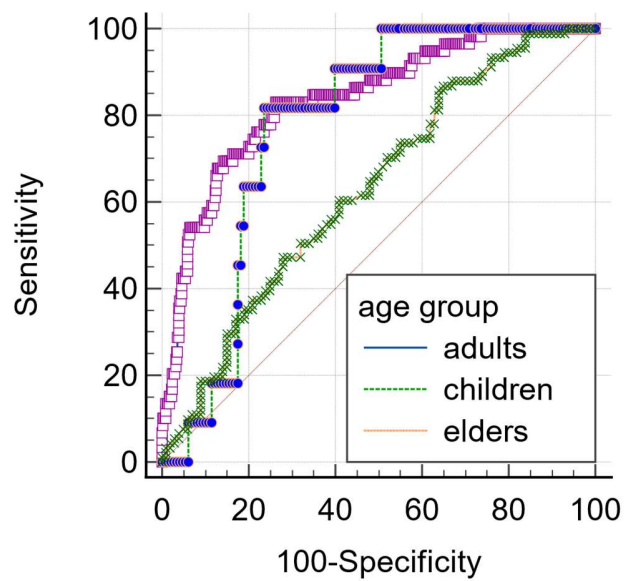

**Figure 4.** ROC curve analysis and comparison of vitamin D in regards to ICU admission

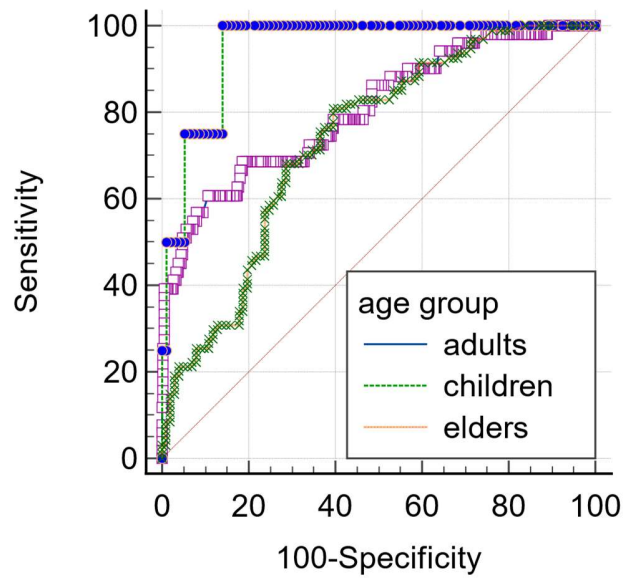

**Figure 5.** ROC curve analysis and comparison of ferritin in regards to ICU admission

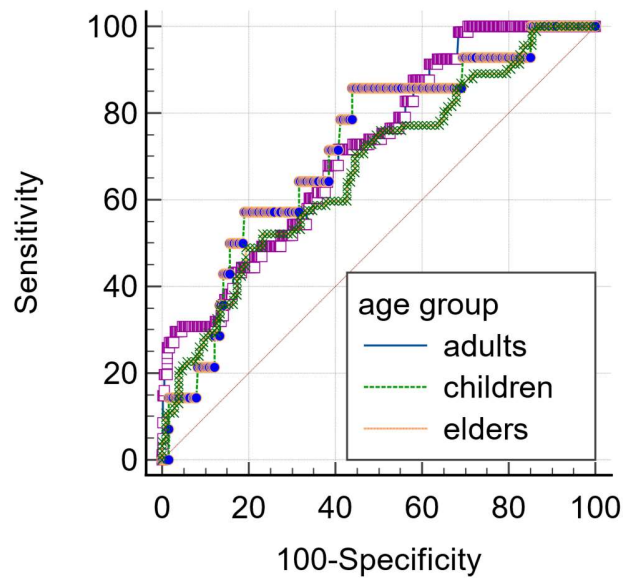

**Figure 6.** ROC curve analysis and comparison of HDL in regards to ICU admission

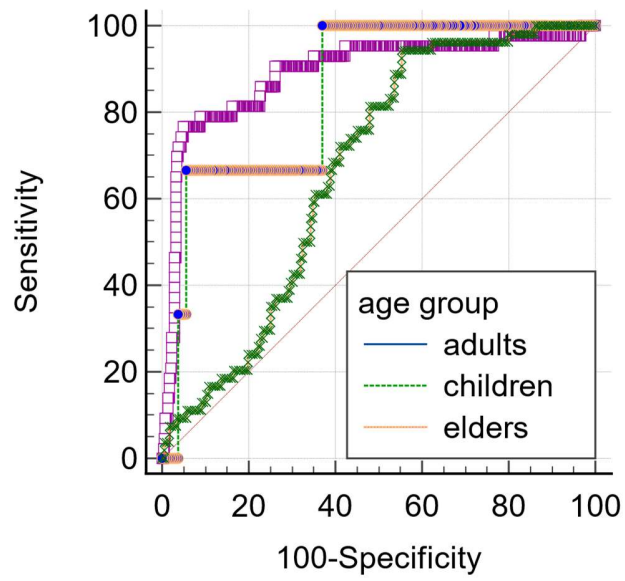

**Figure 7.** ROC curve analysis and comparison of CRP in regards to death

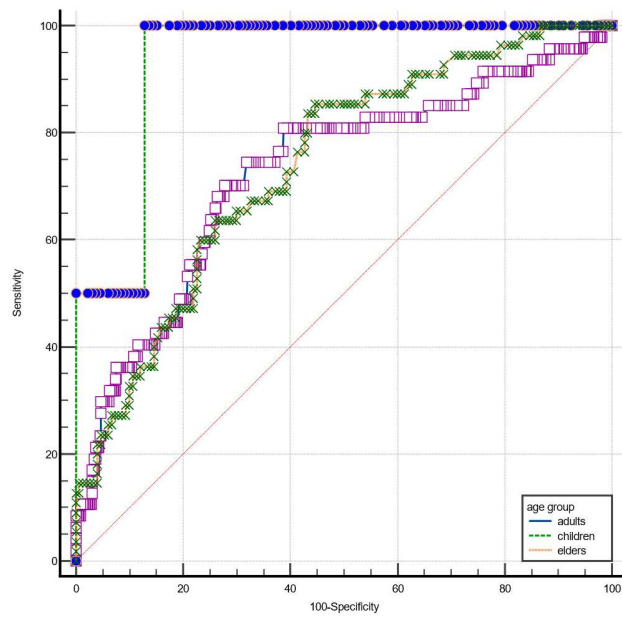

**Figure 8.** ROC curve analysis and comparison of LDH in regards to death

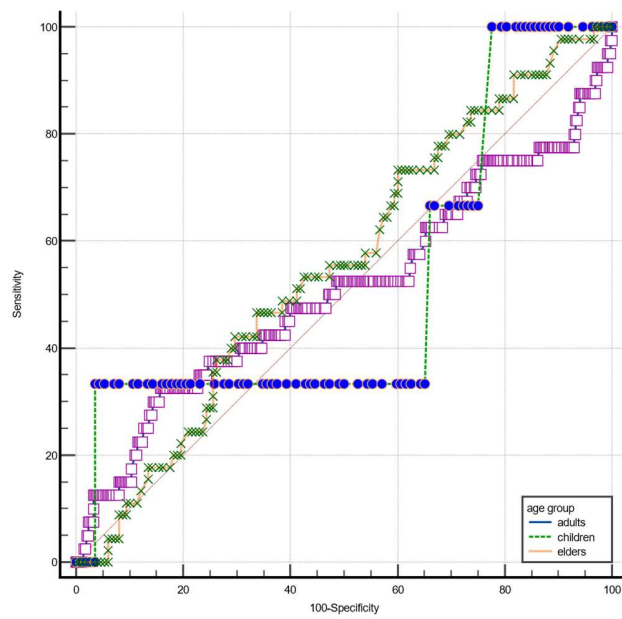

**Figure 9.** ROC curve analysis and comparison of CK in regards to death

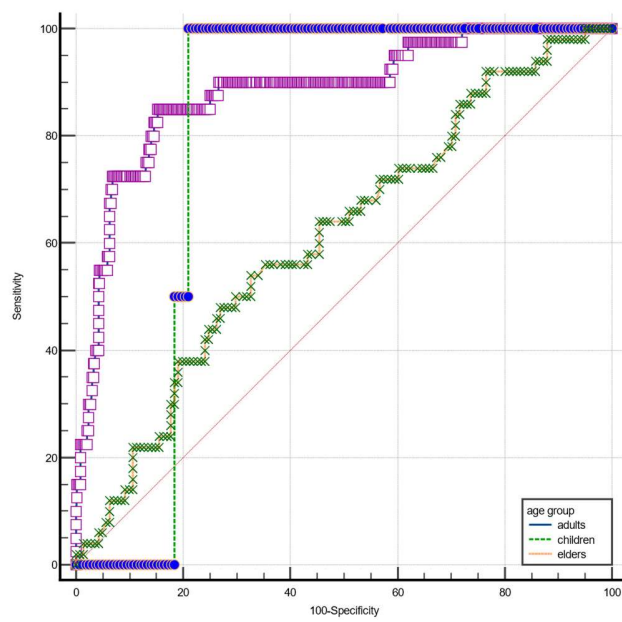

**Figure 10.** ROC curve analysis and comparison of vitamin D in regards to death

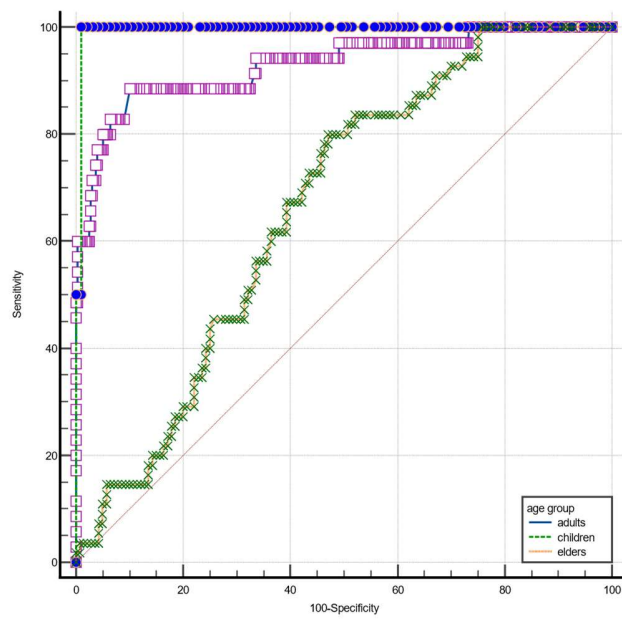

**Figure 11.** ROC curve analysis and comparison of ferritin in regards to death

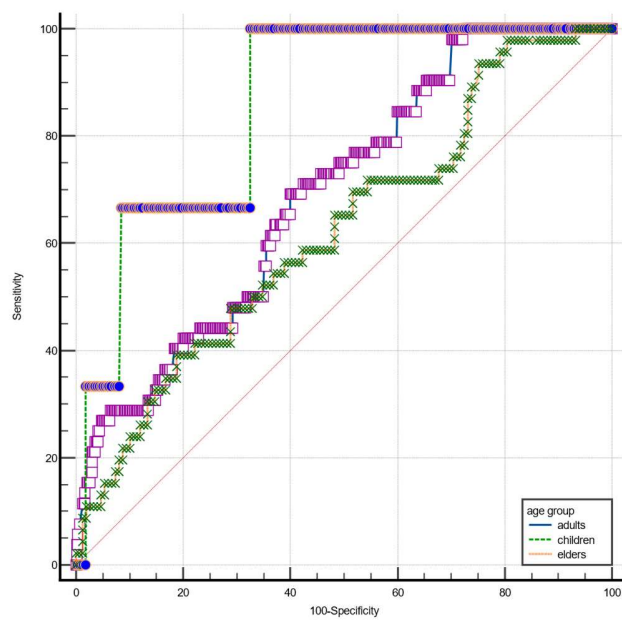

**Figure 12.** ROC curve analysis and comparison of HDL in regards to death
